# Supplementary material
Source: PubMed Central journal article supplement (PMC2410070)

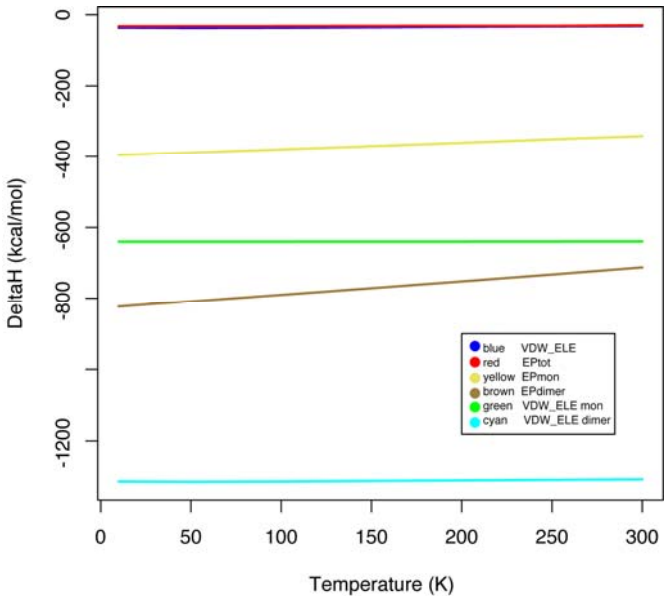

Supplement: pnas_0709489104_1.pdf [file pnas_0709489104_1.pdf]
